# Supplementary material for: Predicting biochemical oxygen demand in European freshwater bodies
Source: PubMed Central journal article supplement (PMC6451040; doi:10.1016/j.scitotenv.2019.02.252), 2019-05-20
Supplement: mmc1.pdf [file mmc1.pdf]

## Supplementary Material to

### ‘Predicting Biochemical Oxygen Demand in European freshwater bodies’

Olga Vigiak, Bruna Grizzetti, Angel Udias-Moinelo, Michela Zanni, Chiara Dorati, Fayçal Bouraoui,

Alberto Pistocchi.

## Content:

### S.1 Distribution of model parameters in behavioral parameter sets

Table S1. Country code and total BOD load inputs (t/y) estimated in this study: DOM\_PS = BOD from domestic point sources; DOM\_DIF = BOD from diffuse domestic sources; IND = BOD from industries; LVST\_HD = BOD from high density livestock facilities; LVST\_LD = BOD from low density livestock (diffuse); Urb = BOD from Urban areas; FRST = BOD from natural areas; Total = sum of BOD input sources.

### S.2 Model evaluation in four Globaqua basins

### S.3 Comparison of BOD emissions in 2000s (Williams et al., 2012) and in 2010s (this study)

## S.1 Distribution of model parameters in behavioral parameter sets

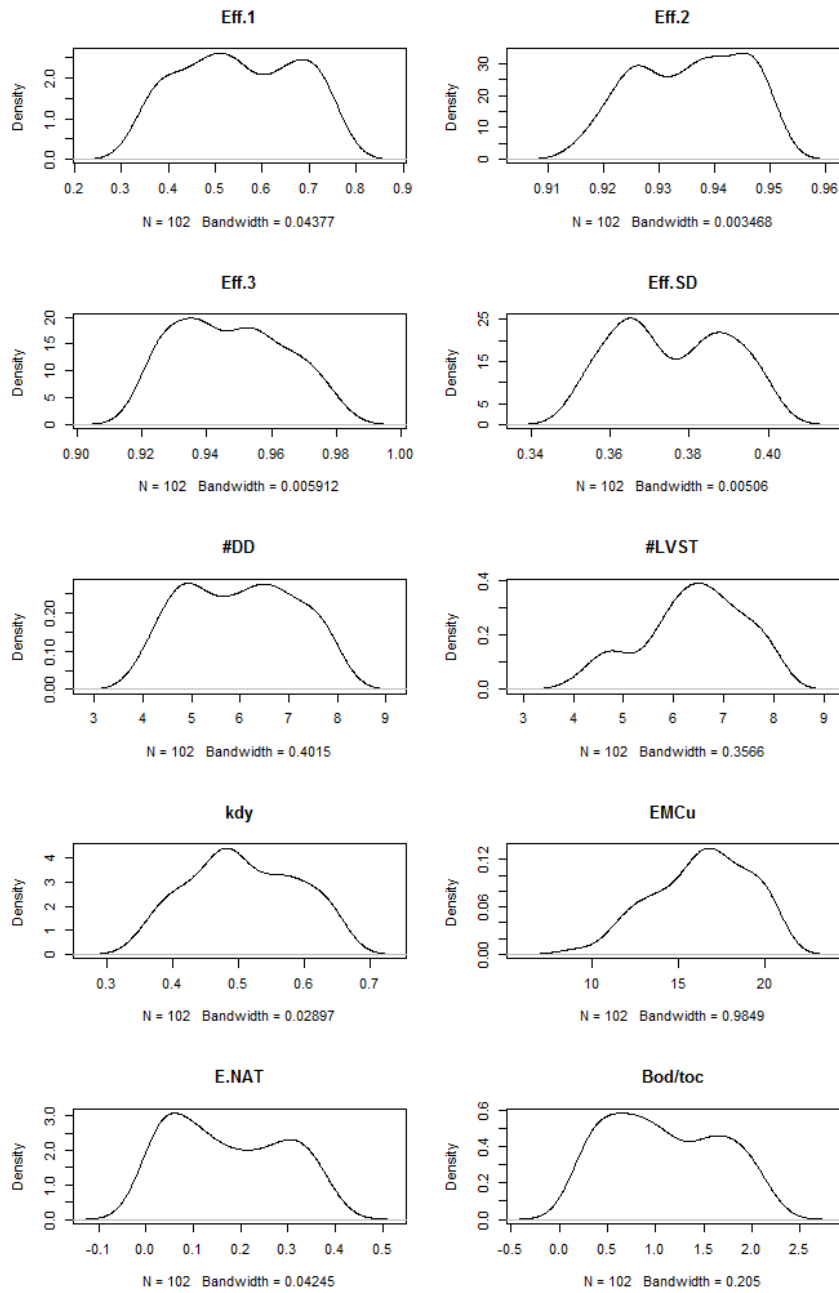

Figure S1. Distribution of model parameters of 102 behavioral parameter sets.

Behavioral parameter distributions are unimodal or bimodal, due to some correlations among parameters. In most cases, behavioural parameter ranges remained large, indicating potential important uncertainty in model estimations.

Table S1. Country code and total BOD load inputs (t/y) estimated in this study: DOM\_PS = BOD from domestic point sources; DOM\_DIF = BOD from diffuse domestic sources; IND = BOD from industries; LVST\_HD = BOD from high density livestock facilities; LVST\_LD = BOD from low density livestock (diffuse); Urb = BOD from Urban areas; FRST = BOD from natural areas; Total = sum of BOD input sources.

| Country            | CODE | DOM_PS | DOM_DIF | IND   | LVST_HD | LVST_LD | Urb    | Frst  | Total   |
|--------------------|------|--------|---------|-------|---------|---------|--------|-------|---------|
| Andorra            | AD   | 129    | 2       | 0     | 9       | 314     | 1      | 57    | 512     |
| Albania            | AL   | 4720   | 1412    | 0     | 3702    | 70363   | 4343   | 2665  | 87205   |
| Austria            | AT   | 17860  | 0       | 8820  | 21961   | 121791  | 22216  | 7879  | 200527  |
| Bosnia Herzegovina | BA   | 30500  | 2001    | 0     | 5379    | 83592   | 4284   | 4758  | 130514  |
| Belgium            | BE   | 30153  | 897     | 4671  | 45736   | 10082   | 26917  | 1701  | 120157  |
| Bulgaria           | BG   | 43761  | 454     | 2007  | 4833    | 103935  | 18363  | 9328  | 182681  |
| Belarus            | BY   | 16450  | 435     | 0     | 16474   | 128111  | 34     | 7109  | 168613  |
| Switzerland        | CH   | 15009  | 2       | 1892  | 17969   | 35021   | 16678  | 3790  | 90361   |
| Cyprus             | CY   | 5400   | 151     | 0     | 1834    | 17090   | 1476   | 1144  | 27095   |
| Czech Republic     | CZ   | 17776  | 2114    | 1900  | 12908   | 140343  | 18743  | 5612  | 199396  |
| Germany            | DE   | 97883  | 1021    | 19768 | 181659  | 402788  | 138123 | 24604 | 865846  |
| Denmark            | DK   | 10192  | 0       | 1717  | 46005   | 36339   | 10301  | 2071  | 106625  |
| Estonia            | EE   | 1558   | 1       | 502   | 1278    | 35639   | 3796   | 5564  | 48338   |
| Spain              | ES   | 88217  | 49      | 9172  | 113812  | 757817  | 39209  | 38715 | 1046991 |
| Finland            | FI   | 4733   | 1261    | 33690 | 4455    | 139218  | 16514  | 49887 | 249758  |
| France             | FR   | 66240  | 4847    | 22924 | 208641  | 545539  | 124080 | 36076 | 1008347 |
| Great Britain      | GB   | 81643  | 220     | 55801 | 131009  | 420763  | 75674  | 12633 | 777743  |
| Guernsey           | GG   | 82     | 0       | 0     | 6       | 121     | 54     | 9     | 272     |
| Greece             | GR   | 9515   | 939     | 433   | 10888   | 238109  | 12382  | 12531 | 284797  |
| Croatia            | HR   | 40126  | 167     | 0     | 5500    | 53917   | 9468   | 6558  | 115736  |
| Hungary            | HU   | 11253  | 1265    | 2236  | 14153   | 121348  | 17888  | 4887  | 173030  |
| Ireland            | IE   | 8586   | 355     | 53    | 64520   | 76573   | 7967   | 3980  | 162034  |
| Isle of Man        | IM   | 125    | 0       | 0     | 438     | 392     | 152    | 86    | 1193    |

|                    |    |        |      |        |       |        |       |        |         |
|--------------------|----|--------|------|--------|-------|--------|-------|--------|---------|
| Italy              | IT | 105760 | 1651 | 70831  | 87687 | 344307 | 77617 | 22673  | 710526  |
| Jersey             | JE | 115    | 0    | 0      | 8     | 292    | 66    | 17     | 498     |
| Kosovo*            | XS | 24402  | 759  | 0      | 446   | 17606  | 1518  | 1085   | 45816   |
| Lichtenstein       | LI | 42     | 1    | 0      | 54    | 253    | 147   | 18     | 515     |
| Lithuania          | LT | 2222   | 928  | 0      | 4795  | 101753 | 8114  | 5399   | 123211  |
| Luxemburg          | LU | 774    | 13   | 139    | 1923  | 621    | 1155  | 186    | 4811    |
| Latvia             | LV | 3341   | 753  | 0      | 1659  | 56995  | 4345  | 7065   | 74158   |
| Monte Carlo        | MC | 0      | 0    | 0      | 0     | 0      | 6     | 0      | 6       |
| Moldova            | MD | 4963   | 840  | 0      | 2072  | 23046  | 130   | 261    | 31312   |
| Montenegro         | ME | 4465   | 276  | 0      | 176   | 17727  | 1966  | 1918   | 26528   |
| Macedonia, FYR     | MK | 25876  | 686  | 0      | 1557  | 38625  | 1505  | 2192   | 70441   |
| Malta              | MT | 461    | 0    | 354    | 430   | 342    | 277   | 18     | 1882    |
| Netherlands        | NL | 15592  | 87   | 6443   | 83779 | 26803  | 22511 | 1805   | 157020  |
| Norway             | NO | 22046  | 759  | 312986 | 3532  | 154976 | 15284 | 49745  | 559328  |
| Poland             | PL | 48414  | 7756 | 6073   | 88942 | 362560 | 61983 | 21006  | 596734  |
| Portugal           | PT | 25280  | 142  | 6628   | 19557 | 127019 | 15051 | 8243   | 201920  |
| Romania            | RO | 235999 | 576  | 2777   | 31964 | 483293 | 43996 | 14183  | 812788  |
| Serbia             | RS | 80250  | 2251 | 2541   | 14842 | 138343 | 9882  | 5678   | 253787  |
| Russian Federation | RU | 53001  | 3592 | 0      | 6358  | 67186  | 77    | 108502 | 238716  |
| Sweden             | SE | 11519  | 2    | 39162  | 6345  | 220122 | 21443 | 65994  | 364587  |
| Slovenia           | SI | 7754   | 772  | 340    | 4553  | 21429  | 4081  | 2372   | 41301   |
| Slovak Republic    | SK | 4836   | 2303 | 2414   | 4413  | 71852  | 11767 | 4167   | 101752  |
| San Marino         | SM | 398    | 1    | 0      | 1     | 102    | 39    | 2      | 543     |
| Turkey             | TR | 508968 | 4797 | 0      | 61849 | 890525 | 38378 | 39356  | 1543873 |
| Ukraine            | UA | 22170  | 2602 | 0      | 4122  | 82764  | 246   | 3149   | 115053  |

\* under United Nations Security Council Resolution 1244/99

## S.2 Model evaluation in four Globaqua basins

An independent BOD monitored dataset was provided in four European basins within the Globaqua project (Navarro-Ortega et al., 2015): the Adige, the Ebro, the Evrotas and the Sava (Fig. S2 indicates their location in relation to the European dataset). The basins encompass a range of European geographic and socio-ecological conditions. The Adige (about 12,000 km<sup>2</sup>) is an alpine basin located in the north-eastern part of Italy. BOD trends in the basin are mainly correlated to population and tourism activities (Diamantini et al., 2018). The Ebro River drains a basin of 85,550 km<sup>2</sup> in Spain. The basin hosts more than 2.7 million inhabitants and approximately 45% of the population concentrate in five cities located next to the Ebro River or its tributaries. BOD concentrations in the river are also affected by agriculture and livestock production and are exacerbated by water abstractions for agricultural and industrial activities that reduce river dilution capacity (Diamantini et al. 2018). The Evrotas river basin covers an area of 1,739 km<sup>2</sup> in the Peloponnese (Greece). The Evrotas River is about 90 km in length and is fed by numerous intermittent and ephemeral tributaries. The basin has a typical Mediterranean climate. The population of the basin is about 45,000 inhabitants. Water quality is affected by high water abstraction for irrigation, disposal of agro-industrial wastes, and agrochemical pollution (Skoulikidis et al., 2011). The Sava River is the largest tributary of the Danube River and its basin extends over almost 100,000 km<sup>2</sup> across Slovenia, Croatia, Bosnia and Herzegovina, Serbia, Montenegro, and Albania (ISRBC, 2009). BOD trends are correlated to population (Diamantini et al., 2018), which amounts to around 8.2 million (ISRBC, 2009).

The BOD dataset of Globaqua (GLOBAQUA, 2017) is quite heterogeneous for number of stations, observation period, and frequency of monitoring. In consideration of European temporal BOD trends, only data from 2008 onward were retained in the analysis. BOD was monitored in the basins with frequency varying from episodic sampling campaigns (in the Ebro and Evrotas) to monthly (in the Sava and Adige). All BOD observations per station were averaged, and only stations with at

least 3 observations and encompassing at least two years were kept for comparison with model outputs. This sample size is very small, but allowed retaining at least a couple of stations in the Evrotas River where BOD had only been measured during water quality research campaigns.

The dataset was used to assess model performance in specific basins. The Adige and the Sava basins were part of the calibration dataset of the model, and some stations are in common between the Globaqua and the European datasets, while the Ebro and Sava were part of the validation dataset, while no data was available for Greece in the Waterbase Rivers dataset.

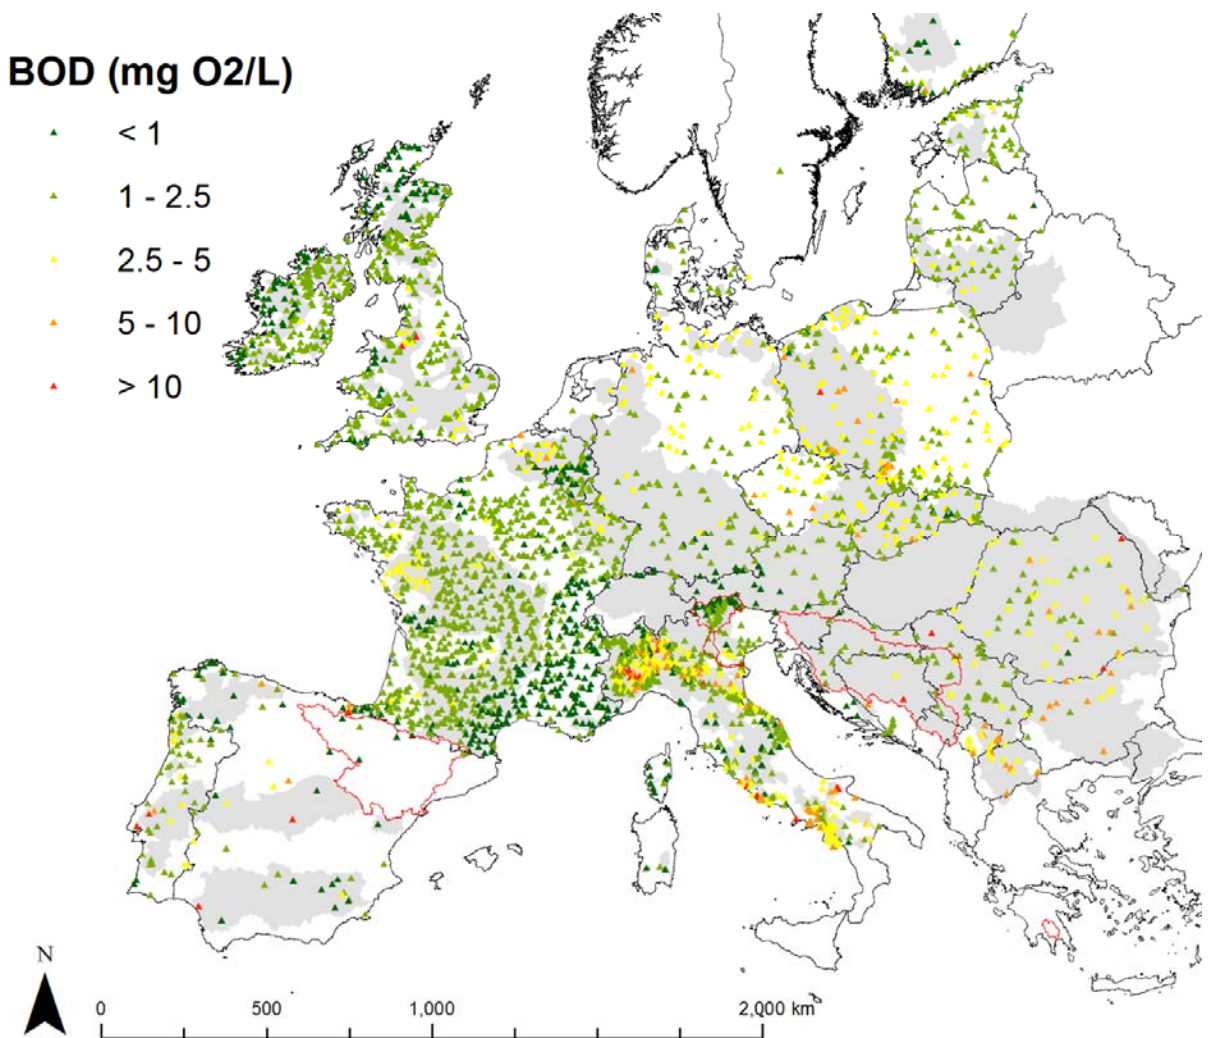

Figure S2. Mean annual BOD concentration [mg O<sub>2</sub>/L] monitored data used in this study. Grey background show basins whose data was used for model calibration. The outlines of four GLOBAQUA basins are shown in red.

### S.2.2 Model results in the Globaqua basins

Modelled BOD concentrations for the four European basins are shown against monitored data of the Waterbase Rivers dataset and of Globaqua dataset in Fig. S3. In the Adige, the model generally under predicted monitored concentrations, especially for the Globaqua dataset. In the Ebro, Waterbase River data were well predicted whereas BOD in Globaqua stations was mostly under predicted. In the Evrotas modelled concentrations were remarkably close to monitored values.

In the Sava, a large scatter was observed for the Waterbase River dataset, especially for three stations. One of these station (RS\_RV\_45098, which is omitted from figure) had a very large predicted concentration (above 40 mg/L). It is likely that this station is misplaced or that streamflow is incorrect. This station is in an urban area and channel regulation may change hydrology considerably. The mean annual streamflow estimated for this location is 0.7 m<sup>3</sup>/s while BOD loadings are very high because this station is part of Belgrade town; unfortunately, no information on streamflow for this station is available in the Waterbase Rivers dataset to help checking its location or streamflow estimation. This data entry is thus omitted in the evaluation of model results.

While errors for the Globaqua dataset were generally larger than for Waterbase Rivers, mean error statistics for the basins (Table S2) were close to European means (Table 3 in paper).

Table S2. Sample size (number of stations), mean absolute error (MAE) and root mean square error (RMSE) of BOD modelled concentration (mg/L) in four European basins for the Waterbase Rivers dataset and an independent dataset (Globaqua project).

|         | Waterbase Rivers dataset |      |      | Globaqua dataset |      |      |
|---------|--------------------------|------|------|------------------|------|------|
|         | Sample size              | MAE  | RMSE | Sample size      | MAE  | RMSE |
| Adige   | 18                       | 0.67 | 0.78 | 28               | 1.32 | 1.50 |
| Ebro    | 3                        | 0.53 | 0.83 | 18               | 1.90 | 2.29 |
| Evrotas | 0                        | NA   | NA   | 3                | 0.61 | 0.65 |
| Sava    | 20*                      | 1.18 | 1.56 | 17               | 1.17 | 1.24 |

\* Station RS\_RV\_45098 is omitted because of a likely location error. By including it, MAE in the Sava would increase to 3.09, RMSE to 9.14.

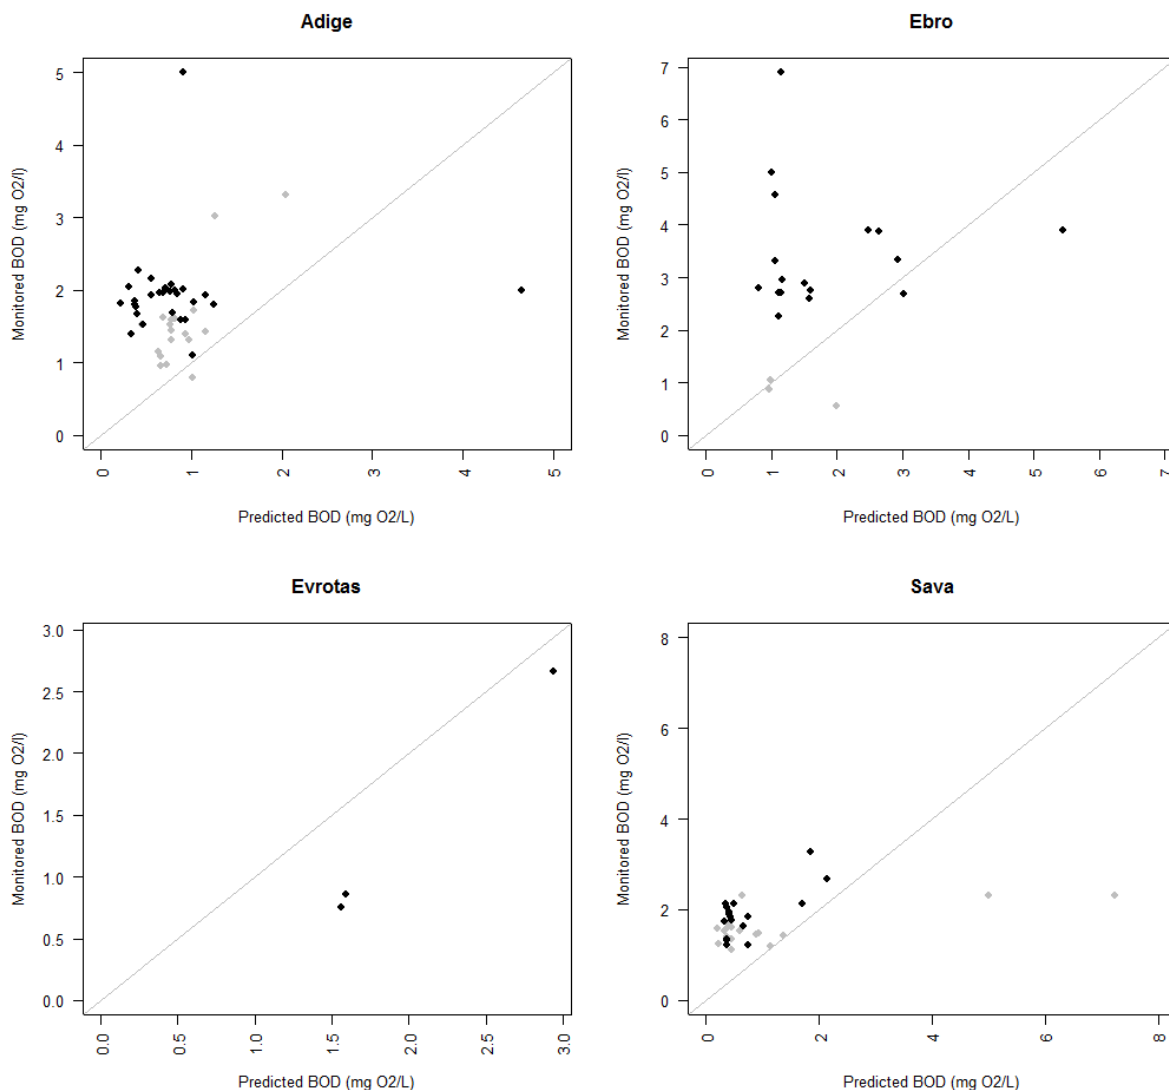

Figure S3. Modelled and monitored BOD concentration in four European basins for which an independent dataset (Globaqua project) was available. Grey dots indicate Waterbase River stations data; black dots indicate Globaqua dataset. Grey line indicates 1:1 relationship.

The availability of two datasets offer an opportunity to compare observed stations/year data entries that were common in the Waterbase Rivers and the Globaqua datasets for the Adige and Sava basins (Fig. S4). While in most cases there was good correspondence between reported values, large discrepancies could be observed between data entries for 2012 in the Adige and for one station in the Sava (HR\_RV\_14001 of Waterbase Rivers; Upstream Una Jasenovac in Globaqua dataset) for which Waterbase Rivers indicated lower BOD concentrations than in Globaqua dataset.



Discrepancies in the Adige basin for 2012 were larger than 1 mg/L and for the Sava station of about 0.4 mg/L. These inconsistencies are large in relation to mean BOD values.

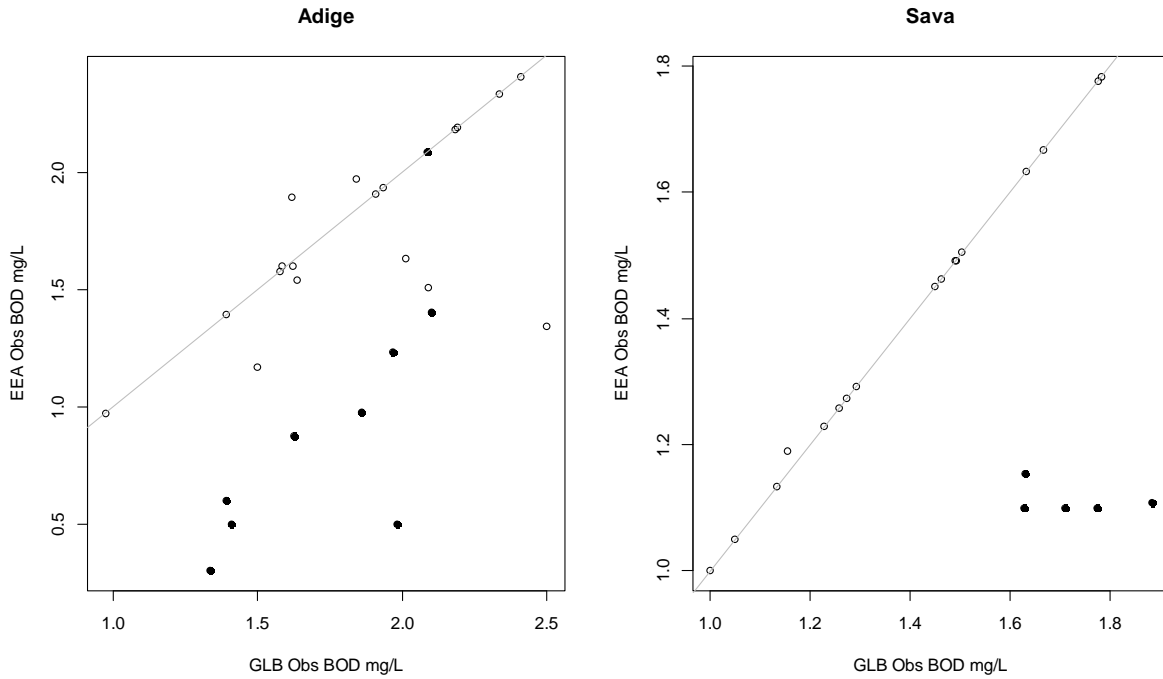

Figure S4. Comparison of monitored data in Waterbase Rivers database (y axis) and in Globaqua dataset (x axis) for common stations and years. In the Adige (left) black dots indicate data entries for 2012. In the Sava (right) dot plots refer to station (HR\_RV\_14001 of Waterbase Rivers; Upstream Una Jasenovac of Globaqua dataset).

### S.3 Comparison of BOD emissions in 2000s and this study

Williams et al. (2012) published national BOD emissions estimated for the year 2000 for 33 European countries. The dataset offers an opportunity to compare emissions between the two periods, however data inputs and estimation methods are very different, hampering direct comparison of sources, instead some sources were aggregated (Table S3). In particular, (i) urban runoff was added to domestic sources as Williams et al. considered urban wash-off treated in WWTPs; and (ii) livestock sources in Williams et al. (2012) were estimated with a statistical approach (Malve et al., 2012) and that study did not consider natural area emissions, so livestock and natural emissions were aggregated.

Table S3. Aggregation of BOD sources in the two study for comparison

| Source of waste       | Williams et al. 2012                            | This study                                       |
|-----------------------|-------------------------------------------------|--------------------------------------------------|
| Domestic+Urban        | Domestic, scattered dwellings, and urban runoff | Domestic (point and diffuse), and urban wash-off |
| Industrial            | Manufacturing                                   | Industrial                                       |
| Other diffuse sources | Livestock                                       | Livestock and natural areas                      |

Figures S5 to S7 shows the country comparison for the three aggregated sources of emissions. In Fig. S5 a considerable reduction, of about 30%, of domestic (plus urban wash-off) emissions is estimated for most countries. The largest exceptions occurred in RO, where an increase in emissions is due to a high share of connected and not treated domestic waste (Vigiak et al., 2018), and in FR and DE, where urban wash-off is considered to contribute large emissions of BOD in our study.

Industrial emissions (S6) in the two studies differed very much, particularly for NO, for which very high BOD loads were derived from E-PRTR dataset. It is unclear if these industrial emissions are correct, however they were retained in the study.

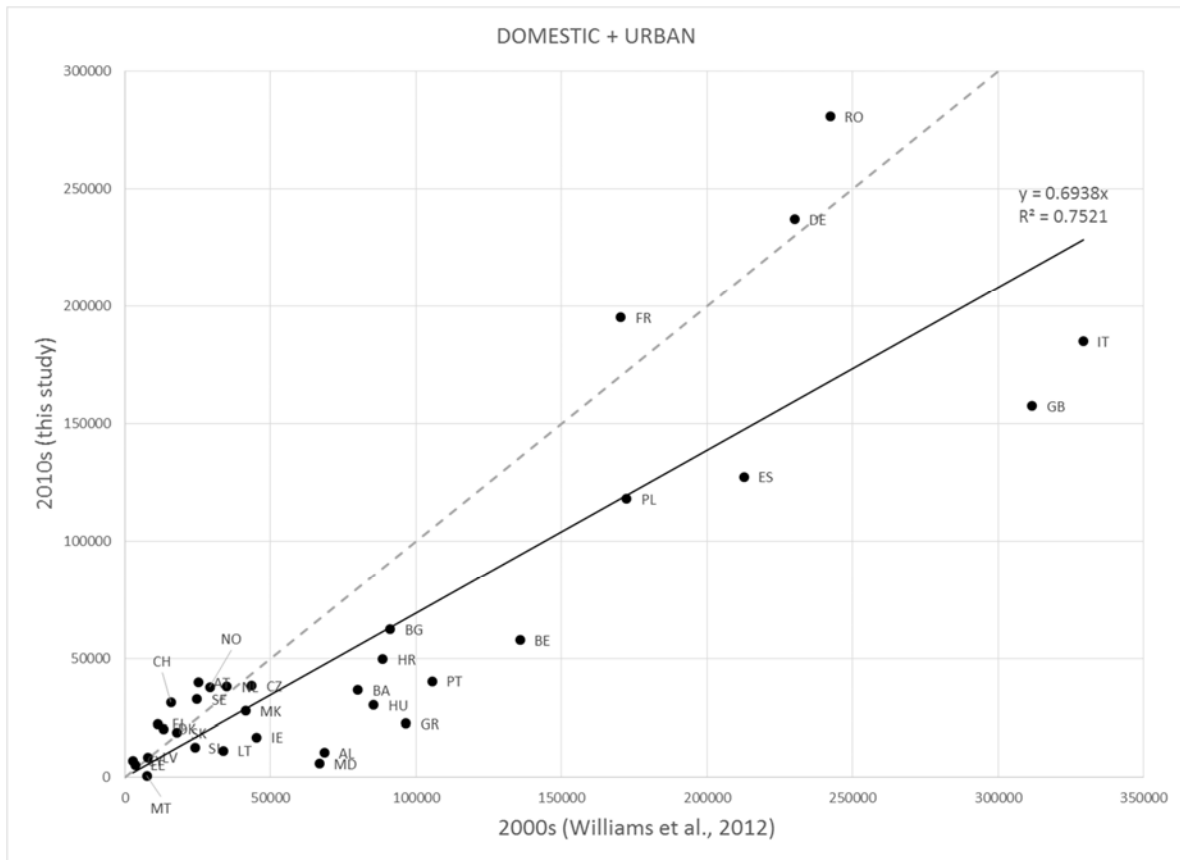

Figure S5. Country domestic and urban BOD emissions (t/y) estimated for the 2000s (Williams et al., 2012; x axis) and in the 2010s (this study, y axis). The black line indicates linear regression equation; the dashed grey line indicates 1:1 relationship.

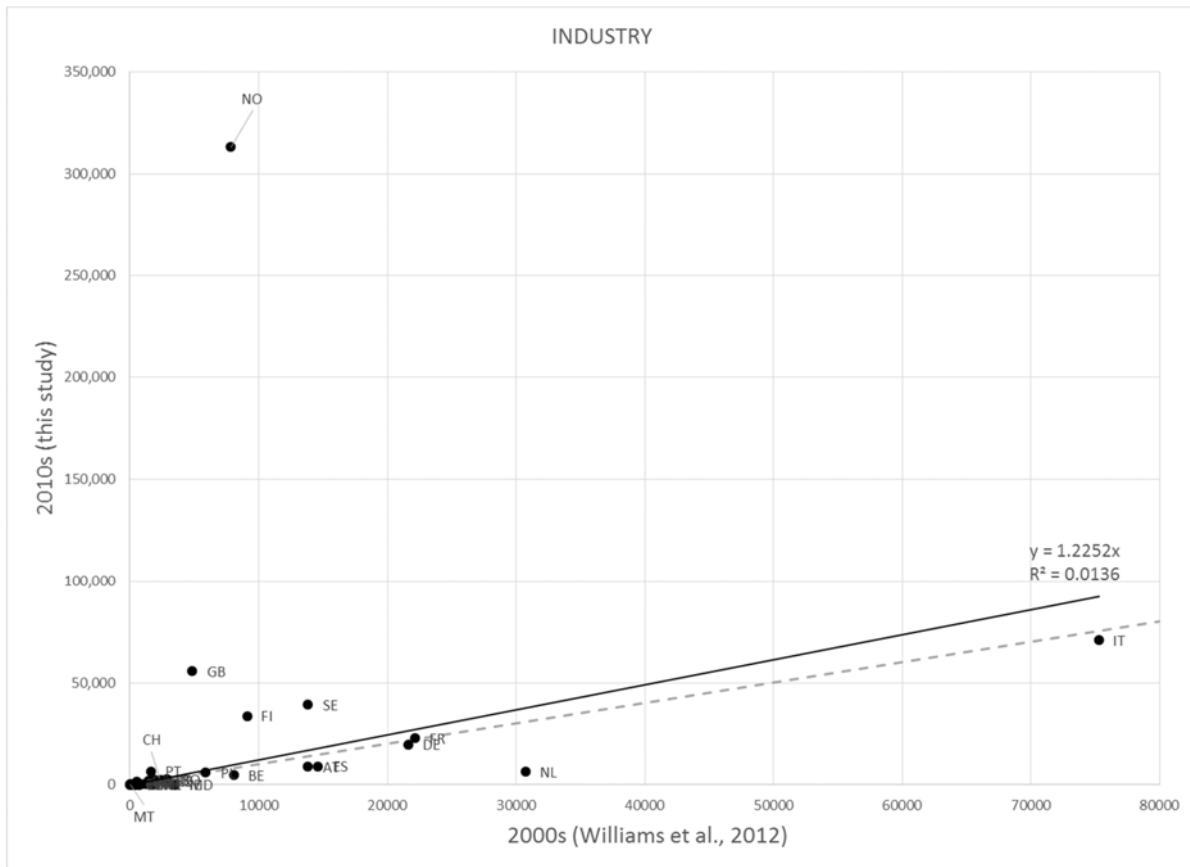

Figure S6. Country industrial BOD emissions (t/y) estimated for the 2000s (Williams et al., 2012; x axis) and in the 2010s (this study, y axis). The black line indicates linear regression equation; the dashed grey line indicates 1:1 relationship.

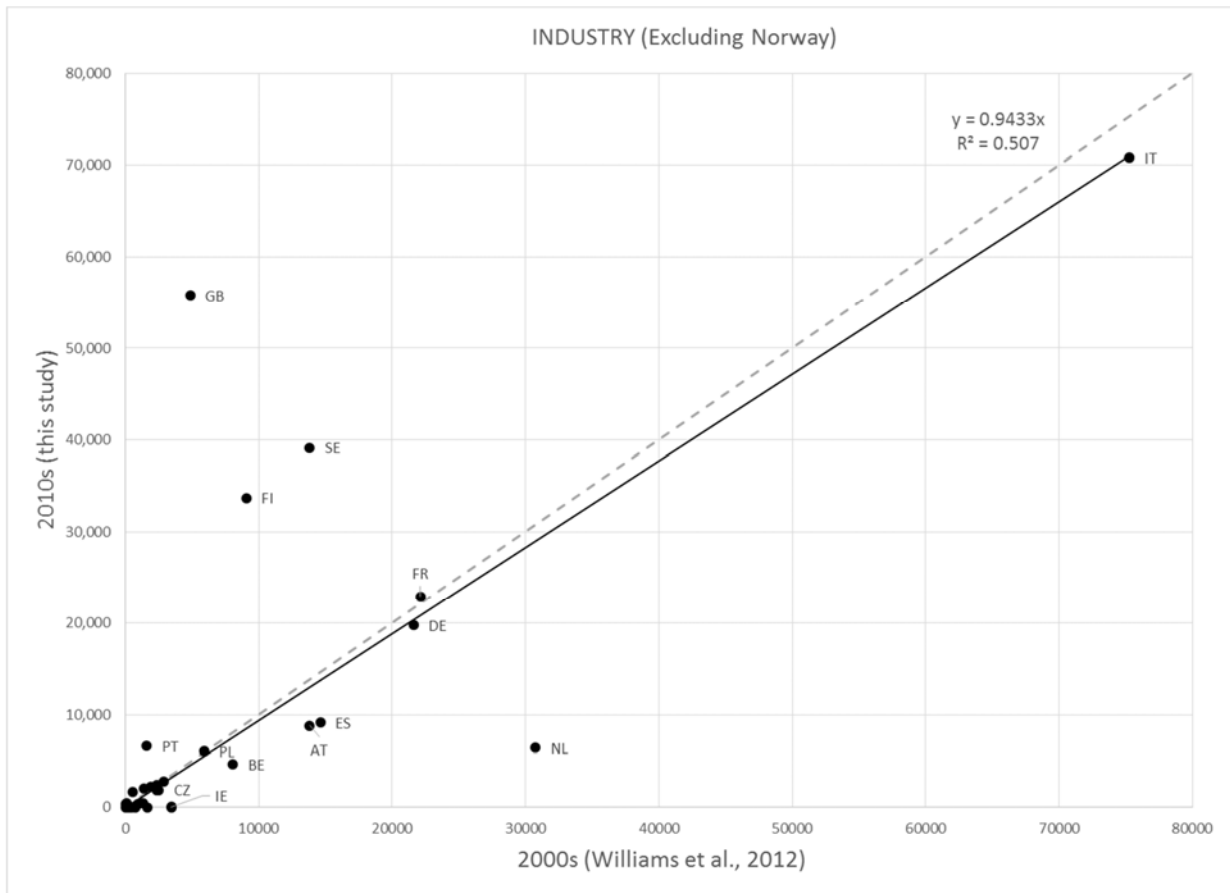

Figure S6b. Country industrial BOD emissions (t/y) estimated for the 2000s (Williams et al., 2012; x axis) and in the 2010s (this study, y axis) when excluding Norway. The black line indicates linear regression equation; the dashed grey line indicates 1:1 relationship.

When excluding Norway, industrial emissions in this study were 94% what estimated in Williams et al. (2012) (Figure S6b). Yet industrial emissions in this study are likely incomplete as for many countries, also within EU28 (CY, HR, LV, LT), BOD industrial emissions were null.

Other diffuse sources estimated in our study were about half those estimated in Williams et al. (2012). In both studies, these sources are heavily calibrated on available data and depending on other sources so a compensation effect in diffuse sources can be expected.

Finally, figure S9 shows total emissions estimated in the two studies (including Norway). The reduction in BOD total emissions between 200s and 2010s is estimated at about 32%.

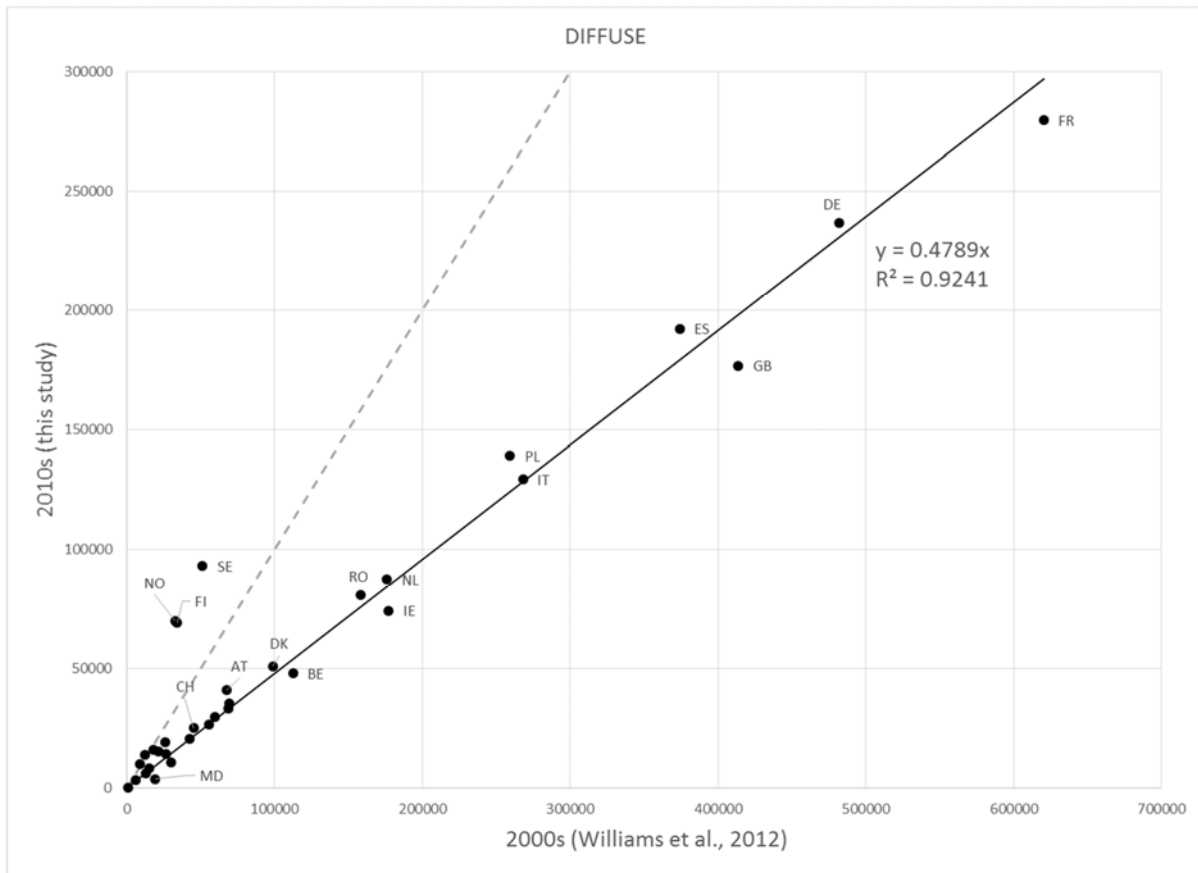

Figure S7. Country diffuse (other than domestic) BOD emissions (t/y) estimated for the 2000s (Williams et al., 2012; x axis) and in the 2010s (this study, y axis). The black line indicates linear regression equation; the dashed grey line indicates 1:1 relationship.

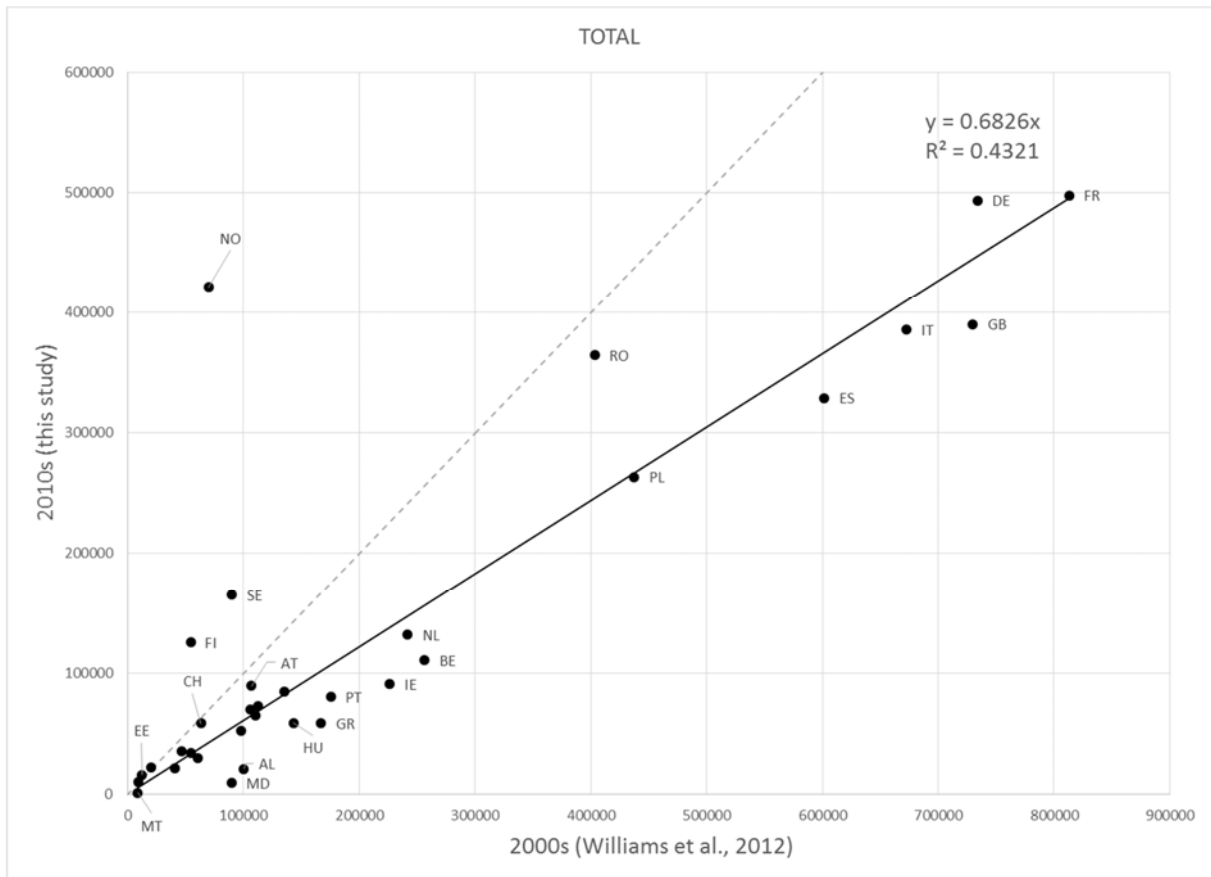

Figure S8. Country total BOD emissions (t/y) estimated for the 2000s (Williams et al., 2012; x axis) and in the 2010s (this study, y axis). The black line indicates linear regression equation; the dashed grey line indicates 1:1 relationship.

## Further references to Supplementary Material

Diamantini, E., Lutz, S.R., Mallucci, S., Majone, B., Merz, R., Bellin, A. 2018. Driver detection of water quality trends in three large European river basins. *Science of the Total Environment* 612, 49-62; doi: 10.1016/j.scitotenv.2017.08.172

Navarro-Ortega, A., Acuña, V., Bellin, A., Burek, P., Cassiani, G., Choukr-Allah, R., Dolédec, S., Elozegi, A., Ferrari, F., Ginebreda, A., Grathwohl, P., Jones, C., Rault, P.K., Kok, K., Koundouri, P., Ludwig, R.P., Merz, R., Milacic, R., Muñoz, I., Nikulin, G., Paniconi, C., Paunović, M., Petrovic, M., Sabater, L., Sabater, S., Skoulikidis, N.T., Slob, A., Teutsch, G., Voulvoulis, N., Barceló, D. 2015. Managing the effects of multiple stressors on aquatic ecosystems under water scarcity. The GLOBAQUA project. *Sci. Total Environ.* 503 (504), 3–9.

Skoulikidis N, Vardakas L, Karaouzas I, Economou A, Dimitriou E, Zogaris S. 2011. Assessing water stress in Mediterranean lotic systems: Insights from an artificially intermittent river in Greece. *Aquatic Sciences, Special Issue: Recent Perspectives on Temporary River Ecology* 73: 581–597
